# Supplementary material
Source: ML conference proceedings conference paper supplement (https://openaccess.thecvf.com/content/ACCV2022/html/Wang_Blind_Image_Super-Resolution_ACCV_2022_paper.html)
Supplement: Supplementary file 1 [file Wang_Blind_Image_Super-Resolution_ACCV_2022_supplemental.pdf]

# Supplemental Material: Blind Image Super-Resolution with Degradation-Aware Adaptation<sup>\*</sup>

Yue Wang<sup>1</sup>, Jiawen Ming<sup>1</sup>, Xu Jia<sup>1\*\*</sup>, James H. Elder<sup>2</sup>, and Huchuan Lu<sup>1\*\*</sup>

<sup>1</sup> Dalian University of Technology, Dalian, 116024, China

<sup>2</sup> York University, Toronto, M3J 1P3, Canada

## 1 Additional Visualization Results

In this supplemental material, we present more visualization results which include in-domain and out-domain synthetic data on Set14 in Fig. 1, and real-world data (RealSR) in Fig. 2.

According to Fig. 1 (a) for in-domain data, we notice that DASR and our method can achieve comparable results which are better than other methods. It is mainly because both DASR and our method apply the implicit degradation representation learning and degradation-aware adaptation for blind-SR, which would be more effective. For the out-domain data in Fig. 1 (b), our method can provide better result compared to not only DASR, but also all other methods. It indicates that our proposed ranking loss as well as region-aware modulation can further improve the generalization ability of our method.

For these methods trained with only synthetic data, we further directly test them on RealSR without re-training or fine-tuning on any real-world data. More visualization results are presented in Fig. 2. It shows that the HR predictions of our method have cleaner details with less artifacts compared to most of the other methods. BSRNet may also provide clearer results, however, it may be over-smoothing which prevents it from restoring some details. It proves that our method can also improve the generalization ability to real-world data.

## 2 Additional Results on the other Synthetic datasets

Meanwhile, we apply two different benchmark datasets, B100 [2] and Urban100 [1], to generate in-domain and out-domain synthetic data for testing. The quantitative results are shown in Tab. 1 and Tab. 2.

It shows that on the in-domain data of B100, the performance of our proposed method is slightly better than DASR, even though our model size is only half

---

<sup>\*</sup> Partially supported by the Natural Science Foundation of China, No. 62106036, and the Fundamental Research Funds for the Central University of China, DUT21RC(3)026.

<sup>\*\*</sup> Corresponding authors. Email address: {xjia, lhchuan}@dlut.edu.cn

Table 1: Quantitive results ( $\times 4$  SR) on in-domain and out-domain synthetic test sets from B100. The best two results are in Red and Blue.

| Method                 | Params Flops |      | In-domain     |        |                |        |                |        | Out-domain    |        |               |        |                |        |
|------------------------|--------------|------|---------------|--------|----------------|--------|----------------|--------|---------------|--------|---------------|--------|----------------|--------|
|                        |              |      | 3.5/2.0/45/15 |        | 4.0/3.0/165/25 |        | 4.0/4.0/180/15 |        | 2.0/4.5/30/40 |        | 3.5/4.5/60/40 |        | 5.0/5.0/180/40 |        |
|                        | (M)          | (G)  | PSNR          | SSIM   | PSNR           | SSIM   | PSNR           | SSIM   | PSNR          | SSIM   | PSNR          | SSIM   | PSNR           | SSIM   |
| DnCNN+IKC              | 6.0          | 24.3 | 24.219        | 0.5689 | 23.300         | 0.5314 | 23.416         | 0.5328 | 22.704        | 0.5166 | 22.492        | 0.5072 | 22.189         | 0.4969 |
| DnCNN+DAN              | 5.0          | 81.1 | 24.075        | 0.5640 | 23.239         | 0.5318 | 23.292         | 0.5315 | 22.706        | 0.5187 | 22.487        | 0.5102 | 22.187         | 0.5007 |
| DnCNN+CF+RCAN          | 26.3         | 68.1 | 23.485        | 0.5543 | 22.519         | 0.5042 | 22.677         | 0.5088 | 21.942        | 0.4831 | 21.663        | 0.4665 | 21.293         | 0.4490 |
| DnCNN+SRMDNF+Predictor | 2.2          | 9.1  | 23.941        | 0.5586 | 23.175         | 0.5297 | 23.210         | 0.5290 | 22.675        | 0.5179 | 22.465        | 0.5098 | 22.171         | 0.5006 |
| DnCNN+MANet            | 10.6         | 40.8 | 22.068        | 0.5129 | 21.856         | 0.4982 | 22.057         | 0.5036 | 21.507        | 0.4874 | 21.597        | 0.4898 | 21.559         | 0.4881 |
| BSRNet                 | 16.7         | 73.5 | 23.467        | 0.5675 | 21.532         | 0.5243 | 22.986         | 0.5446 | 19.642        | 0.4894 | 19.634        | 0.4860 | 19.521         | 0.4808 |
| DASR                   | 6.0          | 13.1 | 24.685        | 0.5897 | 23.784         | 0.5525 | 23.978         | 0.5565 | 22.942        | 0.5241 | 22.752        | 0.5154 | 22.396         | 0.5032 |
| Ours                   | 2.9          | 6.2  | 24.719        | 0.5911 | 23.789         | 0.5530 | 24.031         | 0.5587 | 23.051        | 0.5293 | 22.868        | 0.5208 | 22.507         | 0.5081 |

Table 2: Quantitive results ( $\times 4$  SR) on in-domain and out-domain synthetic test sets from Urban100. The best two results are in Red and Blue.

| Method                 | Params Flops |      | In-domain    |        |               |        | Out-domain   |        |               |        |                |        |
|------------------------|--------------|------|--------------|--------|---------------|--------|--------------|--------|---------------|--------|----------------|--------|
|                        |              |      | 2.0/1.0/10/0 |        | 3.5/2.0/45/15 |        | 2.0/0.5/0/40 |        | 3.5/4.5/60/40 |        | 4.5/5.0/120/40 |        |
|                        | (M)          | (G)  | PSNR         | SSIM   | PSNR          | SSIM   | PSNR         | SSIM   | PSNR          | SSIM   | PSNR           | SSIM   |
| DnCNN+IKC              | 6.0          | 24.3 | 24.815       | 0.7412 | 21.709        | 0.5714 | 21.636       | 0.5794 | 19.977        | 0.4891 | 19.690         | 0.4759 |
| DnCNN+DAN              | 5.0          | 81.1 | 24.472       | 0.7233 | 21.525        | 0.5630 | 21.663       | 0.5776 | 19.941        | 0.4905 | 19.662         | 0.4785 |
| DnCNN+CF+RCAN          | 26.3         | 68.1 | 23.656       | 0.7289 | 21.364        | 0.5604 | 20.724       | 0.5524 | 19.620        | 0.4575 | 19.277         | 0.4367 |
| DnCNN+SRMDNF+Predictor | 2.2          | 9.1  | 23.530       | 0.6792 | 21.332        | 0.5533 | 21.611       | 0.5751 | 19.903        | 0.4892 | 19.635         | 0.4779 |
| DnCNN+MANet            | 10.6         | 40.8 | 17.540       | 0.4153 | 19.329        | 0.4842 | 18.452       | 0.4489 | 18.971        | 0.4579 | 18.982         | 0.4581 |
| BSRNet                 | 16.7         | 73.5 | 24.478       | 0.7210 | 21.587        | 0.5927 | 18.856       | 0.5349 | 18.179        | 0.4843 | 18.050         | 0.4756 |
| DASR                   | 6.0          | 13.1 | 24.945       | 0.7424 | 22.510        | 0.6173 | 21.793       | 0.5835 | 20.293        | 0.5029 | 19.938         | 0.4862 |
| Ours                   | 2.9          | 6.2  | 25.169       | 0.7479 | 22.643        | 0.6222 | 22.107       | 0.6027 | 20.462        | 0.5140 | 20.077         | 0.4955 |

of DASR. For out-domain data of B100 as well as both in-domain and out-domain data of Urban100, we can also achieve better results than all the listed state-of-the-art methods which indicate the effectiveness of our method. Some visualization results are presented in Fig. 3 and Fig. 4.

## References

1. Huang, J.B., Singh, A., Ahuja, N.: Single image super-resolution from transformed self-exemplars. In: Proceedings of the IEEE conference on computer vision and pattern recognition. pp. 5197–5206 (2015)
2. Martin, D., Fowlkes, C., Tal, D., Malik, J.: A database of human segmented natural images and its application to evaluating segmentation algorithms and measuring ecological statistics. In: Proceedings Eighth IEEE International Conference on Computer Vision. ICCV 2001. vol. 2, pp. 416–423. IEEE (2001)

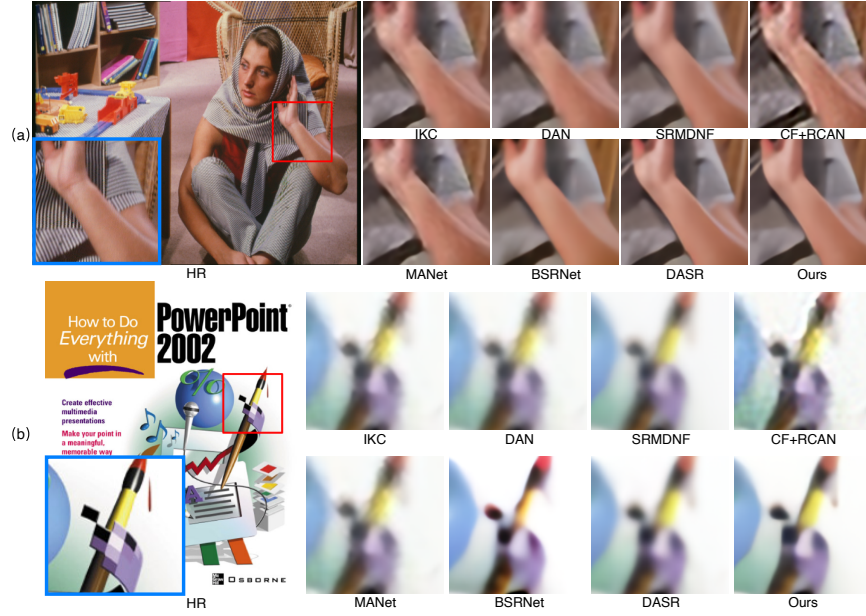

Fig. 1: Visual results( $\times 4$  SR) on in-domain and out-domain synthetic test sets on Set14. Here, (a) are results of in-domain data, (b) are results of out-domain data. For better view, we zoom in the red HR patches and show it in blue patches.

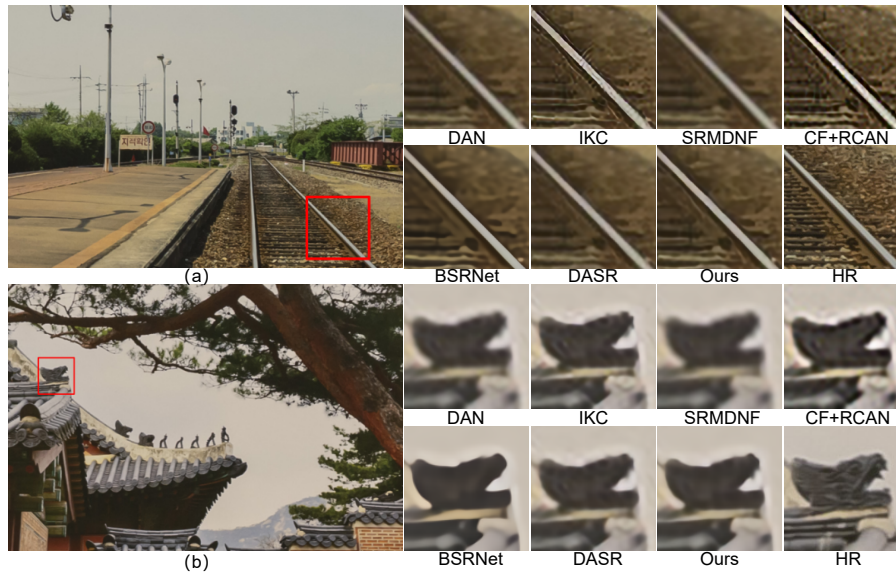

Fig. 2: Visual results( $\times 4$  SR) on RealSR test set.

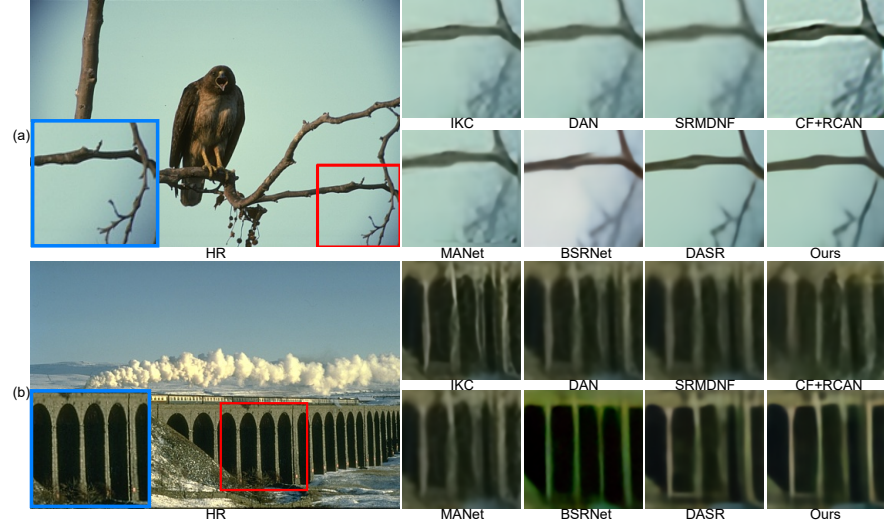

Fig. 3: Visual results ( $\times 4$  SR) on synthetic test sets on B100. For better view, we zoom in the red HR patches and show them in blue patches.

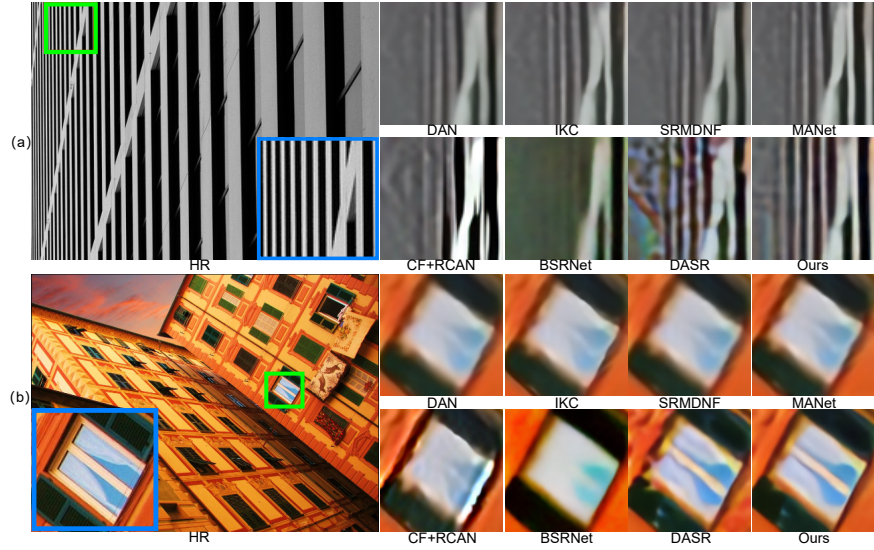

Fig. 4: Visual results ( $\times 4$  SR) on synthetic test sets on Urban100. For better view, we zoom in the green HR patches and show them in blue patches.
